# Supplementary material for: Facile conversion of waste glass into Li storage materials
Source: Royal Society of Chemistry journal article supplement (doi:10.1039/c9gc00042a), 2019-01-01
Supplement: c9gc00042a1.pdf [file c9gc00042a1.pdf]

## SUPPORTING INFORMATION

# Facile conversion of waste glass into Li storage materials

*Seung-Su Lee<sup>a</sup> and Cheol-Min Park<sup>a\*</sup>*

<sup>a</sup>School of Materials Science and Engineering, Kumoh National Institute of Technology, Gumi,  
Gyeongbuk 39177, Republic of Korea

---

\*Cheol-Min Park. Tel.: +82-54-478-7746; Fax: +82-54-478-7769

***E-mail:*** [cmpark@kumoh.ac.kr](mailto:cmpark@kumoh.ac.kr)

**Figure S1.**

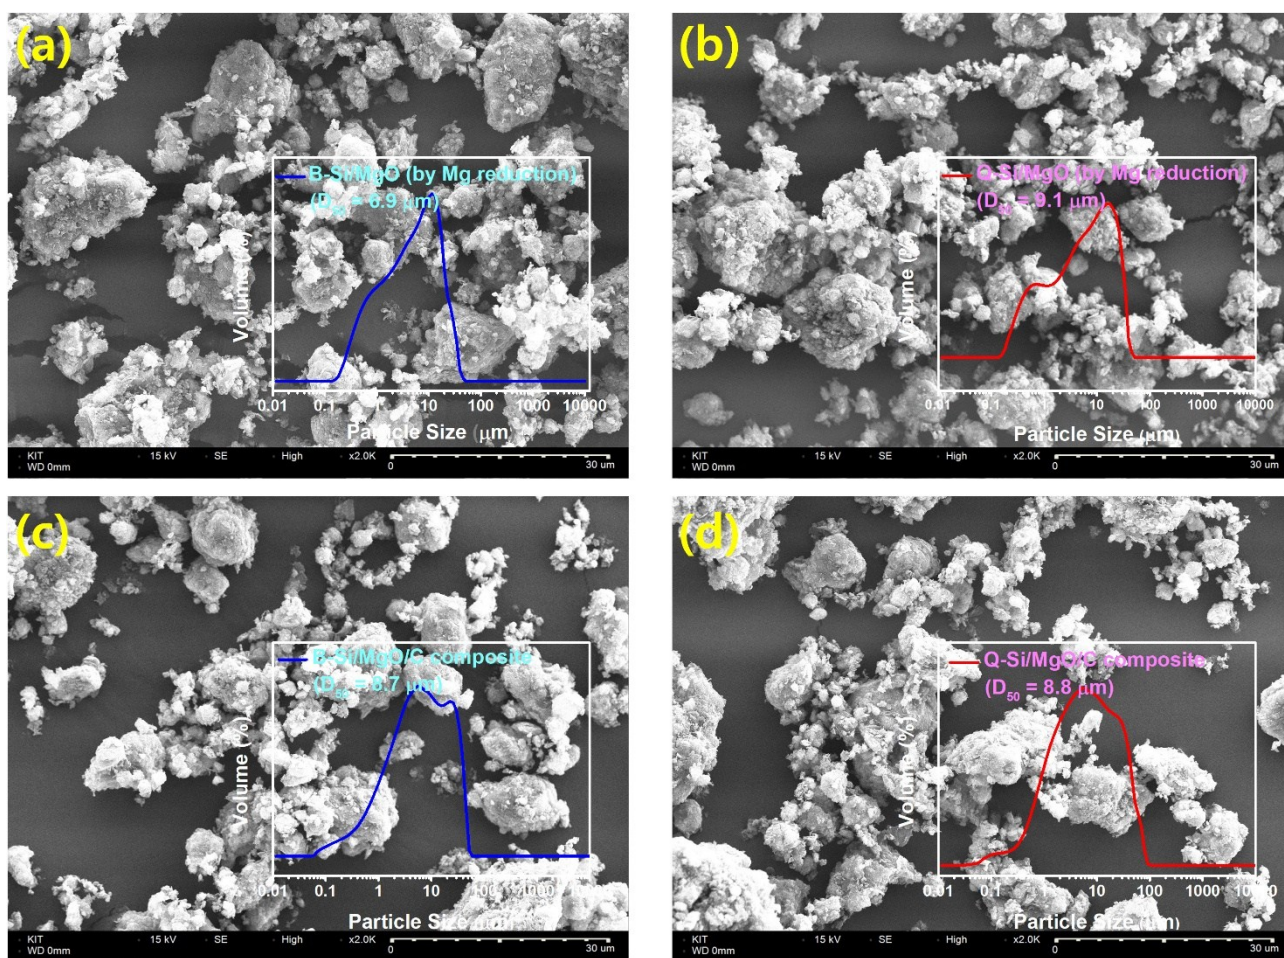

**Figure S1. Particle size and morphology of Si/MgO and Si/MgO/C. SEM images and particle size distributions of (a) B-Si/MgO, (b) Q-Si/MgO, (c) B-Si/MgO/C, and (d) Q-Si/MgO/C.**

**Figure S2.**

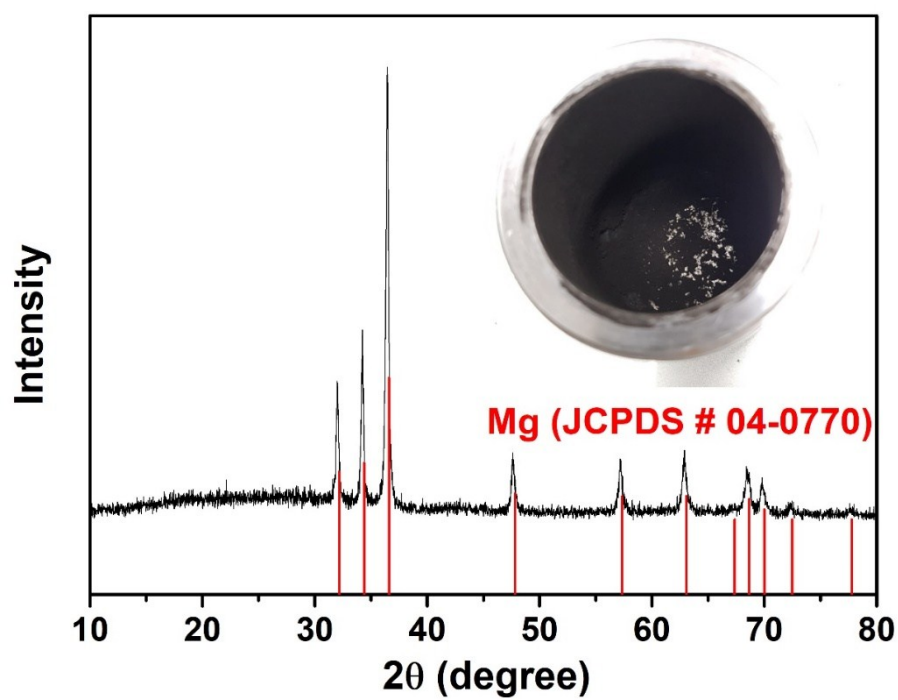

**Figure S2. XRD and photography of S-Si/MgO.** The S-Si/MgO was formed by the high-energy BM process using soda-lime glass and Mg powders.

**Figure S3**

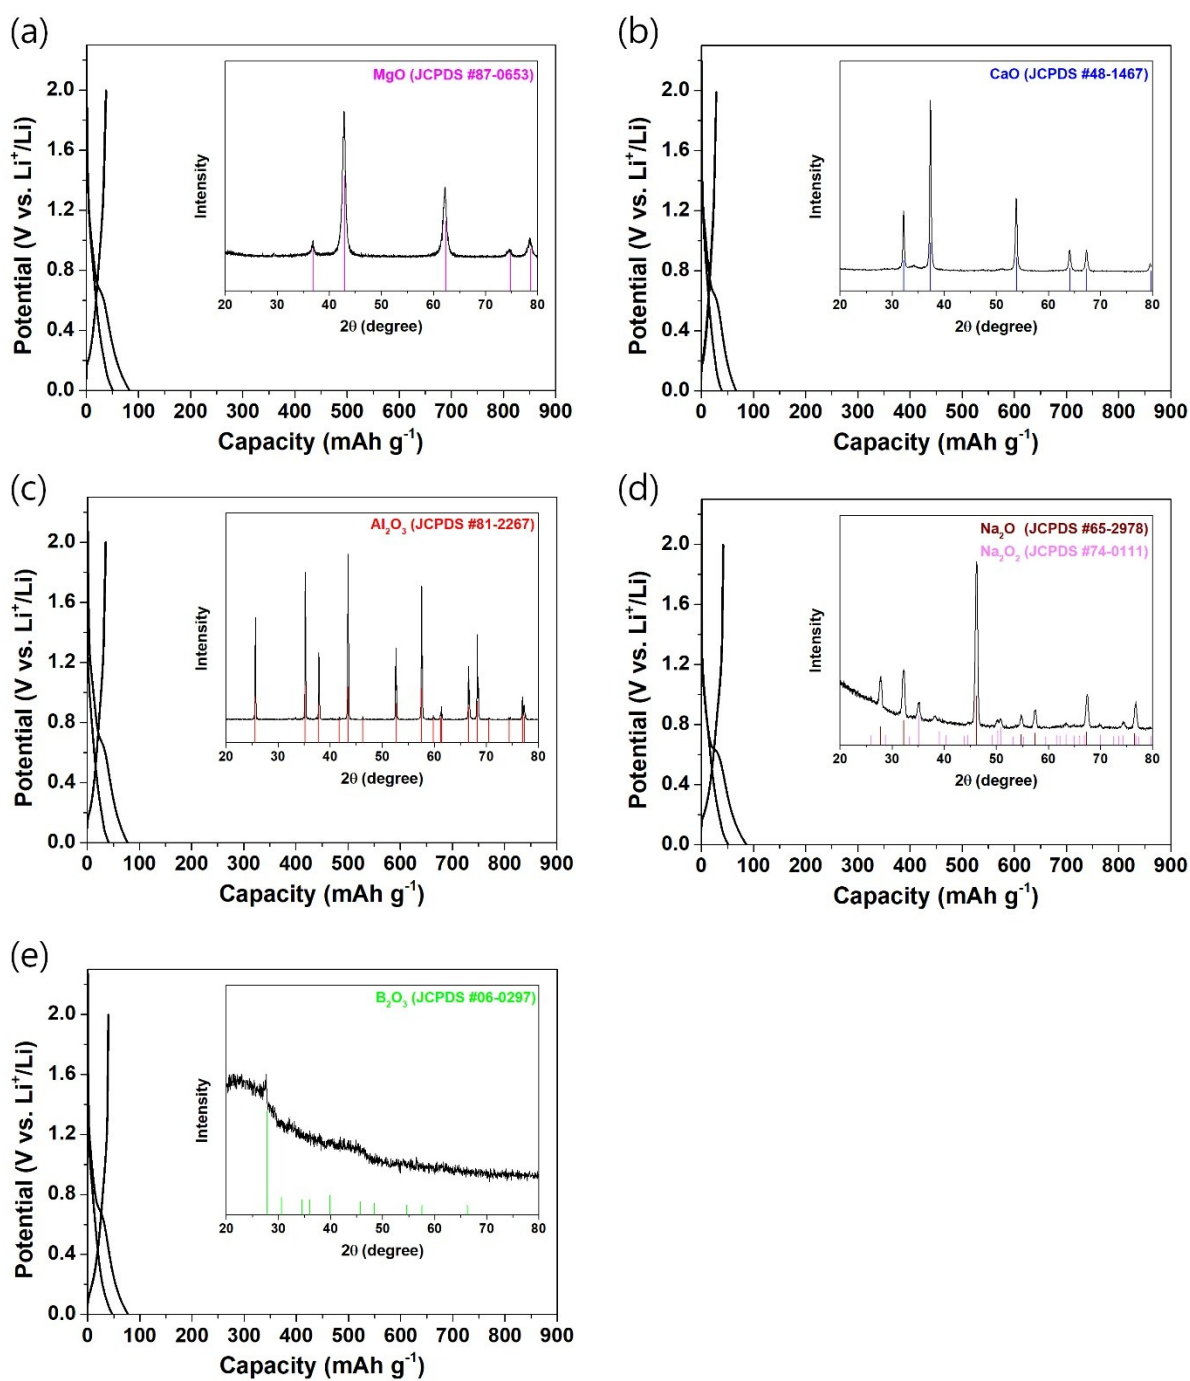

**Figure S3. Electrochemical performances of various glass forming oxides. Voltage profiles and XRD results of (a) MgO, (b) CaO, (c)  $\text{Al}_2\text{O}_3$ , (d)  $\text{Na}_2\text{O}$ , and (e)  $\text{B}_2\text{O}_3$ .**

Figure S4

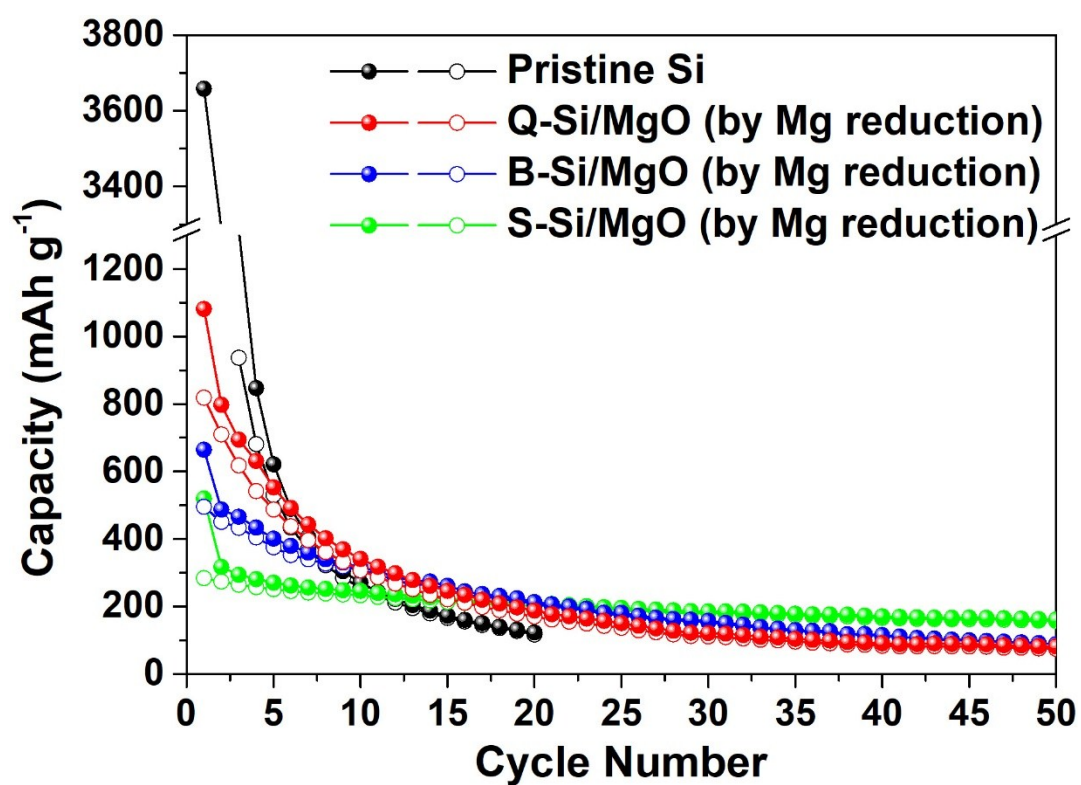

Figure S4. Cycling performance results for Si, Q-Si/MgO, B-Si/MgO, and S-Si/MgO electrodes.

Figure S5.

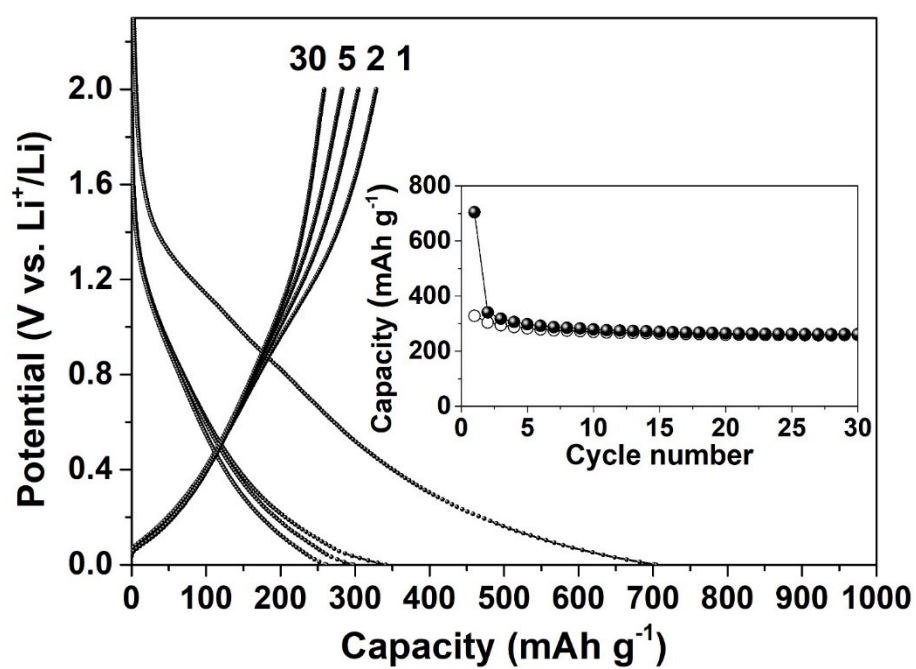

**Figure S5. Electrochemical performances of the ball-milled C (Super P) electrode.** Voltage profile of the ball-milled C at a current density of 100 mA g<sup>-1</sup> (Inset: Cycling behavior of the ball-milled C at a cycling rate of 100 mA g<sup>-1</sup>).



**Figure S6.**

| Electrodes               | Electrodes before Li-reaction                                                                                                                                                                                                     | Li-inserted (0 V)                                                                                                                 | Li-extracted (2 V)                                                                                                              |
|--------------------------|-----------------------------------------------------------------------------------------------------------------------------------------------------------------------------------------------------------------------------------|-----------------------------------------------------------------------------------------------------------------------------------|---------------------------------------------------------------------------------------------------------------------------------|
| (a) Si                   | 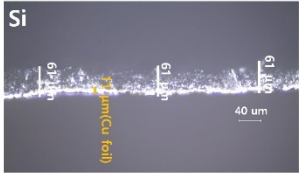 <br>61 - 11 (Cu foil) = 50 $\mu\text{m}$ (active material)     | <br>126 - 11 (Cu) = 115 $\mu\text{m}$ [130.0%]  | <br>80 - 11 (Cu) = 69 $\mu\text{m}$ [38.0%]  |
| (b) Si/C composite       |  <br>76 - 11 (Cu foil) = 65 $\mu\text{m}$ (active material)     | <br>116 - 11 (Cu) = 105 $\mu\text{m}$ [61.5%]   | <br>86 - 11 (Cu) = 75 $\mu\text{m}$ [15.4%]  |
| (c) B-Si/MgO/C composite |  <br>86 - 11 (Cu foil) = 75 $\mu\text{m}$ (active material)     | <br>108 - 11 (Cu) = 97 $\mu\text{m}$ [29.3%]    | <br>90 - 11 (Cu) = 79 $\mu\text{m}$ [5.3%]   |
| (d) Q-Si/MgO/C composite |  <br>85 - 11 (Cu foil) = 74 $\mu\text{m}$ (active material) | <br>112 - 11 (Cu) = 101 $\mu\text{m}$ [36.5%] | <br>92 - 11 (Cu) = 81 $\mu\text{m}$ [9.5%] |

**Figure S6. Electrode thickness changes in Si, Si/C, B-Si/MgO/C, and Q-Si/MgO/C electrodes according to the state-of-charge.** (a) Swelling data of Si electrode (before Li-reaction, Li-inserted at 0 V, and Li-extracted at 2 V). (b) Swelling data of Si/C composite electrode (before Li-reaction, Li-inserted at 0 V, and Li-extracted at 2 V). (c) Swelling data of B-Si/MgO/C composite electrode (before Li-reaction, Li-inserted at 0 V, and Li-extracted at 2 V). (d) Swelling data of Q-Si/MgO/C composite electrode (before Li-reaction, Li-inserted at 0 V, and Li-extracted at 2 V).



Figure S7.

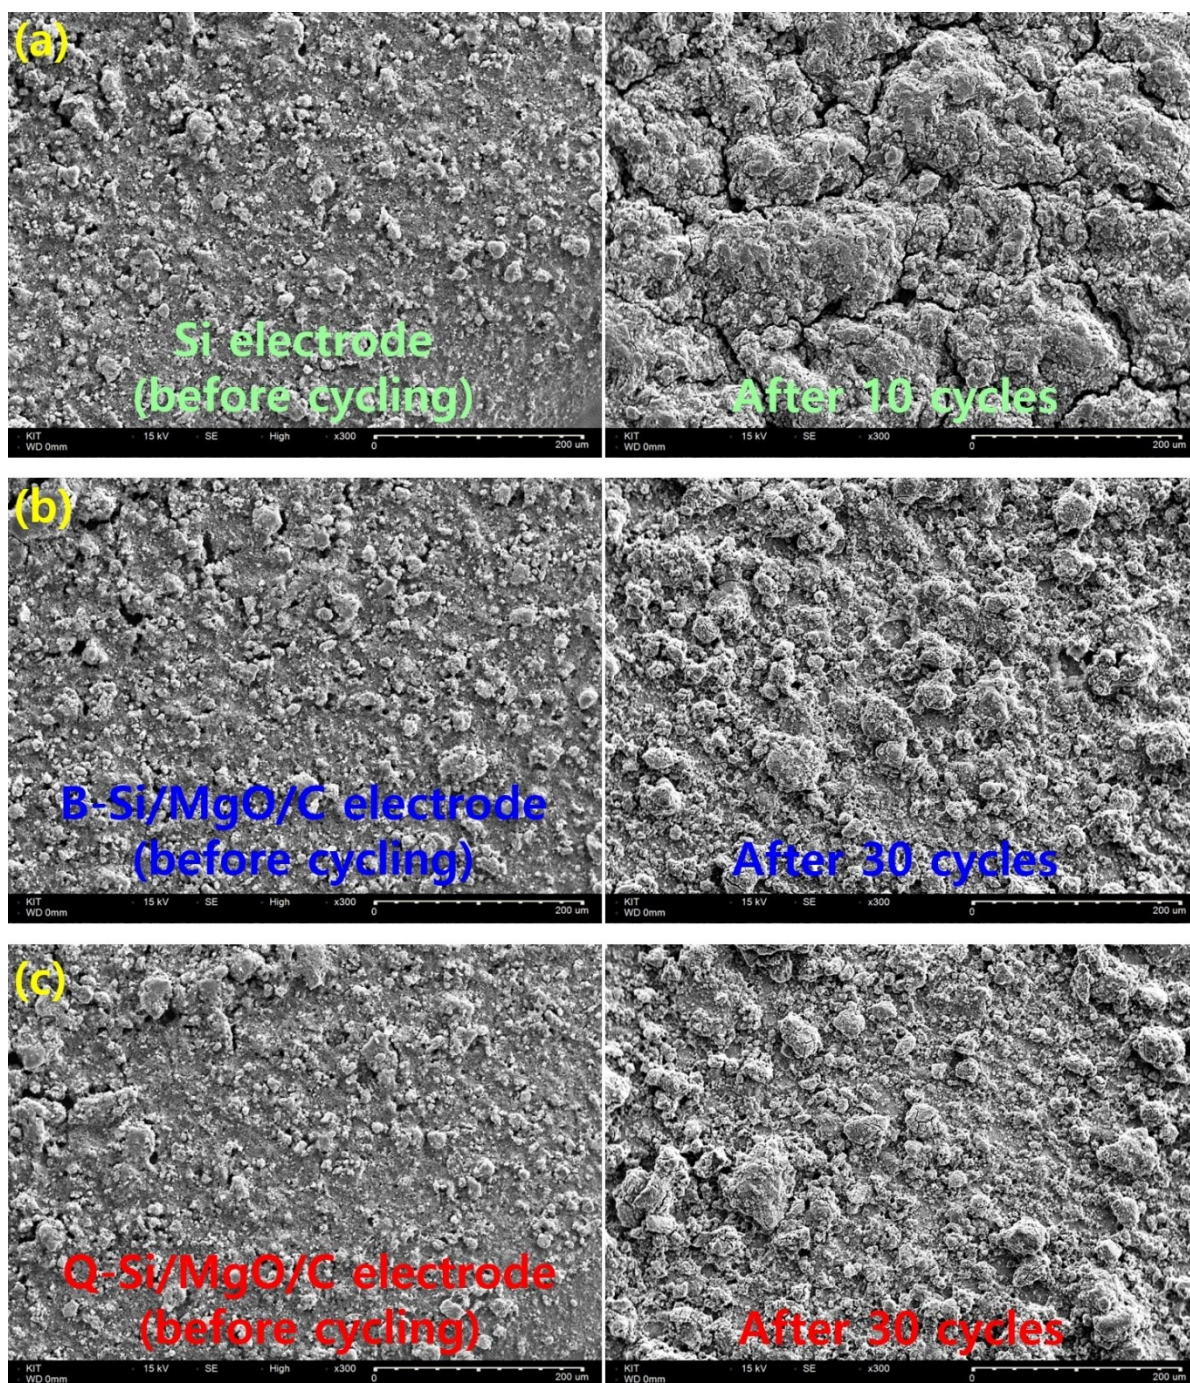

**Figure S7. Morphological investigation using *ex-situ* SEM of the Si, B-Si/MgO/C, and Q-Si/MgO/C electrodes during cycling.** (a) *Ex-situ* SEM results of the pristine Si electrode before cycling and after 10 cycles. (b) *Ex-situ* SEM results of the B-Si/MgO/C electrode before cycling and after 30 cycles. (c) *Ex-situ* SEM results of the Q-Si/MgO/C electrode before cycling and after 30 cycles.



Figure S8.

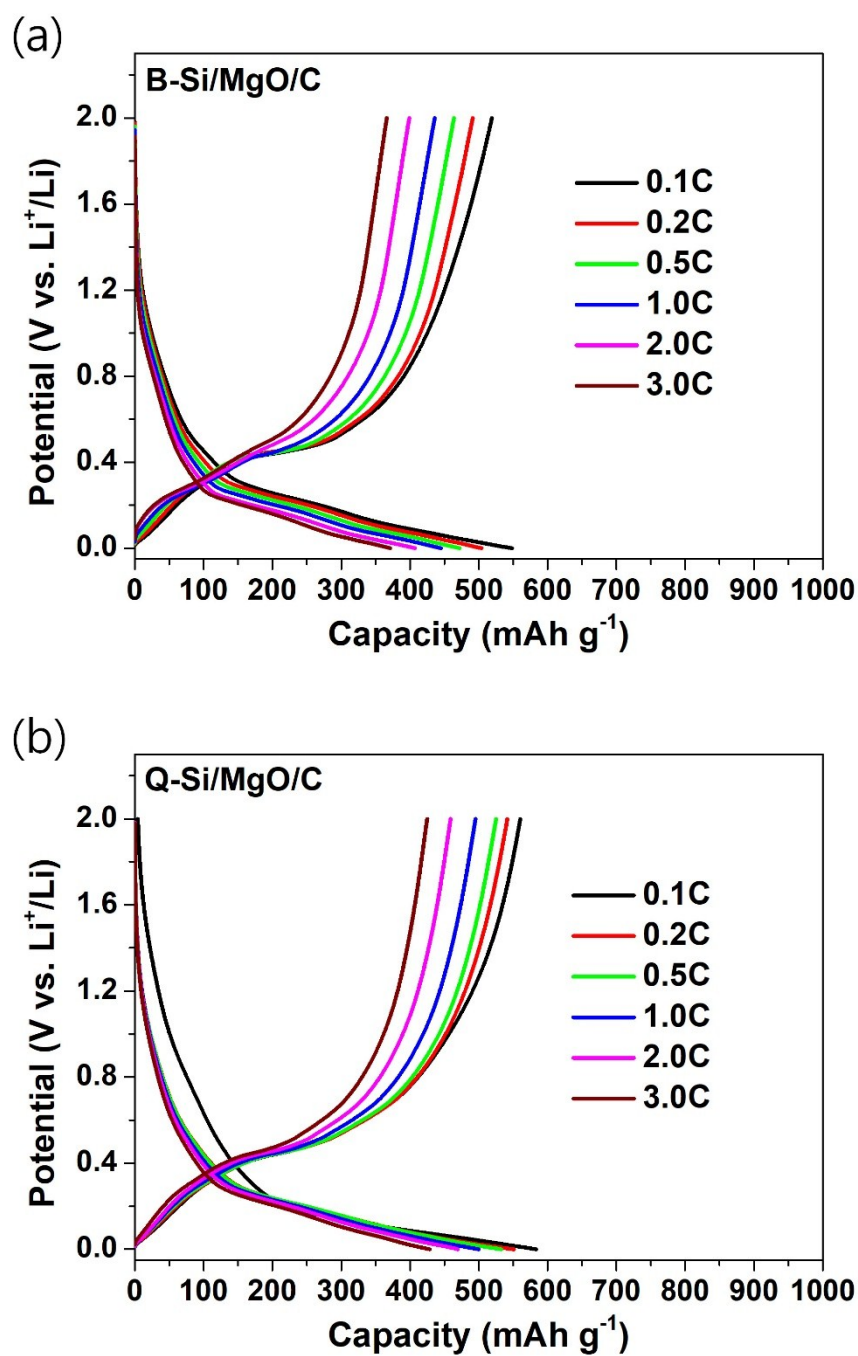

**Figure S8. Voltage profiles at different C-rates of B-Si/MgO/C and Q-Si/MgO/C composite electrodes.** (a) Voltage profiles of B-Si/MgO/C composite electrode. (b) Voltage profiles of Q-Si/MgO/C composite electrode.
